# Supplementary material
Source: PubMed Central journal article supplement (PMC4378395)
Supplement: pnas.201416266SI.pdf [file pnas.201416266SI.pdf]

# Supporting Information

Mauger et al. 10.1073/pnas.1416266112

## SI Methods

**HCV Genomic Subclones and RNA Transcripts.** DNA plasmids with HCV-JFH1 and HCV-Con1 sequences were obtained from Apath. DNA plasmids containing the HCV-H77c genome were a generous gift from Shelton Bradrick, Duke University, Durham, NC. Full-length genomic RNAs were prepared as described (1, 2). Briefly, plasmids were linearized with the appropriate restriction endonuclease, and RNA transcripts were synthesized in vitro (T7 MegaScript; Ambion). RNA was purified by size exclusion chromatography (ChromaSpin 1000 column; Clontech), and lengths were confirmed by denaturing agarose gel electrophoresis. Structure-disrupting mutations were created in the H77S.3 and JFH1-QL genomic clones and their /GLuc2A counterparts (3, 4) using PCR mutagenesis (Table S2).

**SHAPE Modification of Genomic RNAs.** Full-length HCV genomic RNAs were heated for 10 s at 90 °C and placed on ice. RNAs were folded in 1× folding buffer [50 mM Hepes (pH 8.0), 5 mM MgCl<sub>2</sub>, 200 mM potassium acetate (pH 7.5)] at a final concentration of 45 ng/μL by incubating at 65 °C for 5 min followed by slow cooling to 37 °C. RNAs were treated with 0.1 volume of DMSO or with 100 mM 1M7 (5) in DMSO at 37 °C for 5 min. EDTA was added to 10-mM final concentration, reactions were chilled on ice, and the RNA was precipitated with ethanol. For the denaturing modification control, RNA was resuspended in 1× denaturing buffer [50 mM Hepes (pH 8), 4 mM EDTA, 50% (vol/vol) formamide] at a final concentration of 45 ng/μL, heated to 95 °C for 1 min, and modified with 0.1 volume of 100 mM 1M7 in DMSO. Reactions were chilled on ice for 2 min, and RNA was recovered by precipitation with ethanol.

**SHAPE-MaP Library Construction.** DNA libraries for massively parallel sequencing, consisting of plus-1M7 reagent, no-reagent, and denaturing control reactions, were prepared as described previously (6). Briefly, RNA was fragmented at 95 °C in 2.5× first-strand synthesis buffer (Invitrogen) for 4 min and purified through a G-50 Microspin Column (GE Lifesciences). SHAPE-MaP reverse transcription reactions (20 μL) contained 200 ng of random nonamer primers (New England Biolabs) in 1× SHAPE-MaP buffer [50 mM Tris-HCl (pH 8), 75 mM KCl, 6 mM MnCl<sub>2</sub>] with 1 μL SuperScript II reverse transcriptase (Invitrogen). Reactions were incubated at 42 °C for 3 h, and cDNA products were purified using a G-50 Microspin Column (GE Lifesciences). Purified cDNA was then converted to PCR libraries (NEBNext sample preparation; New England Biolabs) beginning with the second-strand synthesis step. PCR libraries were quantified on a Qubit fluorometer (Life Technologies), analyzed with a Bioanalyzer DNA kit (Agilent), and sequenced on a MiSeq instrument (Illumina).

**SHAPE-MaP Data Analysis.** Each of the three HCV genomes were sequenced at a depth that allowed accurate recovery of the SHAPE structural information (6). All constructs showed notable decreases in read depth at two locations: (*i*) within the first 20 nt of each genome and (*ii*) within 30 nt of the poly-U stretch in the 3' UTR. Excluding these two regions, read depth coverage for each of the HCV genomic RNAs (nucleotides 10–9400) is given in the chart below.

Reproducibility was assessed by performing full biological replicate SHAPE-MaP experiments on the H77 genomic RNA with matching read depths. SHAPE-MaP reactivities for the

| RNA   | Sample     | Read depth |           |
|-------|------------|------------|-----------|
|       |            | (Median)   | (Minimum) |
| H77   | No reagent | 13,459     | 2,318     |
|       | 1M7        | 26,090     | 4,364     |
| Con1b | Denatured  | 27,020     | 5,743     |
|       | No reagent | 51,101     | 5,280     |
| JFH1  | 1M7        | 37,997     | 3,533     |
|       | Denatured  | 35,857     | 3,976     |
| JFH1  | No reagent | 35,998     | 2,254     |
|       | 1M7        | 68,877     | 4,956     |
|       | Denatured  | 63,109     | 6,909     |

replicates gave a correlation value ( $r = 0.88$ ), comparable to the known variability of SHAPE-MaP experiments.

SHAPE-MaP reactivities for each nucleotide within a given genome were generated from the raw FASTQ files using the SHAPE-MaP analysis pipeline (6). Because sequencing depth was low in the poly-U region and X-tail in the 3' UTR, SHAPE reactivities are not reported for these regions. SHAPE reactivities for all three HCV RNA genomes are provided in Dataset S1.

**Secondary Structure Models and Shannon Entropies.** The minimum free-energy genome secondary structure models and base-pairing probabilities were generated using SHAPE reactivities as constraints using the SHAPE-MaP folding pipeline (6). Briefly, folding was performed using RNAstructure (v5.6) (7) and folding was performed in a stepwise manner. The genome primary sequence and SHAPE reactivities were divided into overlapping windows, 2,000 nt in length, and offset by 100 nt. These windows were folded using the *Partition* routine of RNAstructure with the following constraints: no maximum distance, SHAPEslope = 1.8, SHAPEintercept = -0.6, and the max pairing distance set to 500 nt. Shannon entropies were calculated for each window (6, 8) and averaged for overlapping regions to obtain genome-wide Shannon entropies and base pair probabilities. Base pairs predicted to form with >99% confidence were forced to form in calculating the minimum free-energy fold. The minimum free-energy structure was calculated using the *Fold* routine in RNAstructure for all possible 4,000-nt windows in 375-nt steps with the constraints listed above. Final minimum free-energy structures were assembled from the most common base pairs identified within overlapping regions. Secondary structure models in connect (.ct) format are provided in Dataset S2.

**Comparison of Genome Structure Models Generated With and Without SHAPE Data.** Secondary structure models were generated using the same procedures described above, except that experimental SHAPE-MaP reactivities were omitted (Fig. S6).

**Helix Length and RNase L Cleavage Site Analyses.** Minimum free-energy genome secondary structure models were analyzed to identify all continuous helices in each genome and to generate histograms of helix lengths. In a separate analysis, we identified the locations and reactivities of all potential high-affinity RNase L cleavage sites (UU/UA) dinucleotides within the H77 genome. The regions of RNase L cleavage sites reported by Han et al. (9) were compared with the entire population. The statistical significance of the observed differences was assigned by bootstrapping (with replacement) 10,000 equivalently sized populations of randomly selected cleavage sites from the total pool of potential RNase L sites. The distribution of mean SHAPE-MaP reactivities from the bootstrapped populations was compared

with the mean SHAPE-MaP reactivity of the active RNase L cleavage sites.

**Comparative Analysis of Structural Models.** Median SHAPE reactivities and Shannon entropies were calculated over centered, 55-nt windows for each position in the genome. For each of the subtypes tested, we identified genomic regions where the median SHAPE reactivities and median Shannon entropy were below the global median values for at least 40 nt. Positions in the genome having median SHAPE reactivity or median Shannon entropy below the global medians within all three subtypes tested were defined as mutually structured and mutually low-entropy, respectively. Regions of conserved base pairing were computationally identified using a genomic alignment of the primary nucleotide sequences for H77, JFH1, and Con1. Regions of conserved base pairing (Table S1) were required to be longer than 75 nt in length and the predicted secondary structures had to have  $\geq 75\%$  secondary structure similarity, measured using the mountain similarity metric (10).

**Synonymous Substitution Rate Analysis.** Synonymous substitution rates were analyzed for conserved base pairings over 12 regions located within the ORF, using seven different alignments of clinically isolated HCV genomic sequences downloaded from publically accessible databases (Dataset S3). Each alignment contained 47–100 sequences and was aligned using MAFFT v6.952 with default settings (11). The first alignment contained a representative selection of HCV sequences across all seven HCV genotypes. The other six alignments contained segregated populations of sequences from genotypes 1a, 1b, 2, 3, 4, and 6. From the perspective of synonymous substitution rate inference, these six alignments represent independent HCV replicates. We were able to split genotype 1 into 1a and 1b for the analyses because of the large number of publicly available sequences. Genotypes 5 and 7 were excluded from the subtype-specific analysis because too few sequences are available to afford sufficient statistical power for synonymous substitution rate and coevolution analyses. Synonymous substitution rates at individual codons were inferred using FUBAR (12). A Mann–Whitney *U* test was then used to assess whether synonymous substitution rates within a region were significantly higher or lower than expected, where the expectation was based on synonymous substitution rates throughout the remainder of the genome. The *z*-scores lower than  $-1.96$  were considered statistically significant evidence ( $P < 0.05$ ) that the synonymous substitution rate of codons within a given region was lower than that of the remainder of the coding region.

**Complementary Coevolution Analysis.** Complementary coevolution was defined as nucleotide pairs that detectably covary to maintain Watson–Crick or GU-wobble base-pairing and thus base-pairing potential. A representative alignment of 250 HCV sequences (Datasets S1 and S2) was analyzed for evidence of complementarily coevolving nucleotide sites by examining every pair of polymorphic nucleotide sites within 100 nt of one another using HyPhy (13), as described previously (14). The maximum distance between potentially coevolving sites was restricted to 100 nt because of the long running time of this analysis. This restriction did not significantly impact subsequent tests for associations between base pairing and complementary coevolution because of the vast majority of the SHAPE-identified base pairings fell within this range. This analysis was used to generate a matrix of coevolution *P* values, where a *P* value  $< 0.05$  was taken as statistically significant evidence that the evolution of a given pair of nucleotides was better supported by a model of complementary coevolution than a model of independent evolution. Using the matrix of coevolution *P* values, a *z*-score was calculated for the entire HCV genome and each of the 15 regions of conserved base pairing. For each region, a Mann–Whitney *U* test was used to calculate a *z*-score by comparing the coevolution *P* values

corresponding to SHAPE-identified base-pairings within a given region to coevolution *P* values corresponding to all other pairs of nucleotides within the same region that were not base-paired within the SHAPE-informed structures. If *z*-scores were lower than  $-1.96$ , it was taken as significant evidence ( $P < 0.05$ ) of better than expected correspondence between coevolving site pairs and SHAPE-inferred base-paired sites.

**Comparison with Prior Bioinformatic Analysis of HCV Genome Sequences.** Two prior studies noted that synonymous substitution rates within HCV coding regions are lowest in regions that were predicted to have the greatest degree of secondary structure (15, 16). Similarly, these studies also found that at least some of the nucleotides, predicted to be base-paired within secondary structures, have coevolved to maintain complementarity (15). Here we have explicitly tested for and statistically confirmed these associations using a maximum-likelihood synonymous substitution rate and coevolution inference methods and SHAPE-derived structural data (as opposed to computationally inferred structures). In addition, our coevolution and synonymous substitution rate analyses were performed on HCV datasets that were  $>10$ -fold larger than those that could be examined previously, which enabled us to statistically test—within individual structural elements—for associations between nucleotide coevolution and synonymous substitution rates.

**HCV RNA Transfection.** RNA was synthesized in vitro (T7 MEGAScript reagents; Ambion) after linearizing plasmids with XbaI. Following treatment with RNase-free DNase to remove template DNA, RNA was purified using affinity chromatograph (RNAeasy columns; Qiagen). RNA transfection was carried out by Trans-IT mRNA transfection (Mirus). The replication capacity of GLuc-containing constructs was determined by transfecting 250 ng RNA into  $7.5 \times 10^4$  Huh-7.5 cells in 24-well plates. The capacity of the HCV mutants (no GLuc insertion) to produce infectious virus particles was determined by transfecting 1.25  $\mu$ g RNA into  $6 \times 10^5$  cells in six-well plates.

**Gussia Luciferase Activity Assay.** Structure-disrupting mutations were created in the H77S.3/GLuc2a variant (17) and in a cell culture-adapted JFH1 (JFH1-QL/GLuc2A, genotype 2a) (18) variant that produce *Gussia princeps* luciferase (GLuc) from an in-frame insertion of the GLuc sequence between p7 and NS2A in the viral polyprotein. Following RNA transfection into human hepatoma Huh-7.5 cells, cell-culture supernatant fluids were collected and fresh medium added at 24-h intervals. Secreted GLuc activity was measured in 25  $\mu$ L aliquots of the supernatant fluids in the Bioluminescence *Gussia* luciferase assay (New England Biolabs). The luminescent signal was measured on a multimode microplate reader (Synergy 2; Bio-Tek) (17).

**Virus Yield Assays.** Human hepatoma Huh-7.5 cells were split at a 1:2 ratio at 24 h after transfection of viral RNAs (with no GLuc insertion), and the medium replaced with fresh media containing 100 mM Hepes every 24 h thereafter. Cell culture supernatant fluids were collected at 72-h posttransfection for virus titration. Infectious virus was quantified using a fluorescent focus virus titration assay (17, 19). Briefly, cells were seeded in 48-well plates at a density of  $1 \times 10^5$  cells per well 24 h before inoculation with 100  $\mu$ L of virus-containing medium. Cells were maintained at 37 °C in a 5% CO<sub>2</sub> environment and fed with 200  $\mu$ L medium 24 h later. After 24 h (JFH1-QL and its mutants) or after 48 h (H77S.3 and its mutants) of additional incubation, cells were fixed in methanol-acetone (1:1) at  $-20$  °C for 10 min and stained with a monoclonal antibody (C7-50; Thermo Scientific) to the HCV core protein (1:300). After extensive washing, the cells were stained with Alexa488-conjugated goat anti-mouse IgG antibody. Clusters of infected cells stained for Core antigen were considered to constitute a single infectious focus-forming unit.

- Wakita T, et al. (2005) Production of infectious hepatitis C virus in tissue culture from a cloned viral genome. *Nat Med* 11(7):791–796.
- Yanagi M, Purcell RH, Emerson SU, Bukh J (1997) Transcripts from a single full-length cDNA clone of hepatitis C virus are infectious when directly transfected into the liver of a chimpanzee. *Proc Natl Acad Sci USA* 94(16):8738–8743.
- Tuplin A, Evans DJ, Simmonds P (2004) Detailed mapping of RNA secondary structures in core and NS5B-encoding region sequences of hepatitis C virus by RNase cleavage and novel bioinformatic prediction methods. *J Gen Virol* 85(Pt 10):3037–3047.
- Vassilaki N, et al. (2008) Role of the hepatitis C virus core+1 open reading frame and core *cis*-acting RNA elements in viral RNA translation and replication. *J Virol* 82(23):11503–11515.
- Mortimer SA, Weeks KM (2007) A fast-acting reagent for accurate analysis of RNA secondary and tertiary structure by SHAPE chemistry. *J Am Chem Soc* 129(14):4144–4145.
- Siegfried NA, Busan S, Rice GM, Nelson JA, Weeks KM (2014) RNA motif discovery by SHAPE and mutational profiling (SHAPE-MaP). *Nat Methods* 11(9):959–965.
- Reuter JS, Mathews DH (2010) RNAstructure: Software for RNA secondary structure prediction and analysis. *BMC Bioinformatics* 11:129.
- Huynen M, Gutell R, Konings D (1997) Assessing the reliability of RNA folding using statistical mechanics. *J Mol Biol* 267(5):1104–1112.
- Han JQ, Wroblewski G, Xu Z, Silverman RH, Barton DJ (2004) Sensitivity of hepatitis C virus RNA to the antiviral enzyme ribonuclease L is determined by a subset of efficient cleavage sites. *J Interferon Cytokine Res* 24(11):664–676.
- Moulton V, Zuker M, Steel M, Pointon R, Penny D (2000) Metrics on RNA secondary structures. *J Comput Biol* 7(1-2):277–292.
- Katoh K, Toh H (2008) Recent developments in the MAFFT multiple sequence alignment program. *Brief Bioinform* 9(4):286–298.
- Murrell B, et al. (2013) FUBAR: A fast, unconstrained Bayesian approximation for inferring selection. *Mol Biol Evol* 30(5):1196–1205.
- Pond SL, Frost SD, Muse SV (2005) HyPhy: Hypothesis testing using phylogenies. *Bioinformatics* 21(5):676–679.
- Muhire BM, et al. (2014) Evidence of pervasive biologically functional secondary structures within the genomes of eukaryotic single-stranded DNA viruses. *J Virol* 88(4):1972–1989.
- Tuplin A, Wood J, Evans DJ, Patel AH, Simmonds P (2002) Thermodynamic and phylogenetic prediction of RNA secondary structures in the coding region of hepatitis C virus. *RNA* 8(6):824–841.
- Davis M, Sagan SM, Pezacki JP, Evans DJ, Simmonds P (2008) Bioinformatic and physical characterizations of genome-scale ordered RNA structure in mammalian RNA viruses. *J Virol* 82(23):11824–11836.
- Shimakami T, et al. (2011) Protease inhibitor-resistant hepatitis C virus mutants with reduced fitness from impaired production of infectious virus. *Gastroenterology* 140(2):667–675.
- Ma Y, Yates J, Liang Y, Lemon SM, Yi M (2008) NS3 helicase domains involved in infectious intracellular hepatitis C virus particle assembly. *J Virol* 82(15):7624–7639.
- Yi M, Villanueva RA, Thomas DL, Wakita T, Lemon SM (2006) Production of infectious genotype 1a hepatitis C virus (Hutchinson strain) in cultured human hepatoma cells. *Proc Natl Acad Sci USA* 103(7):2310–2315.

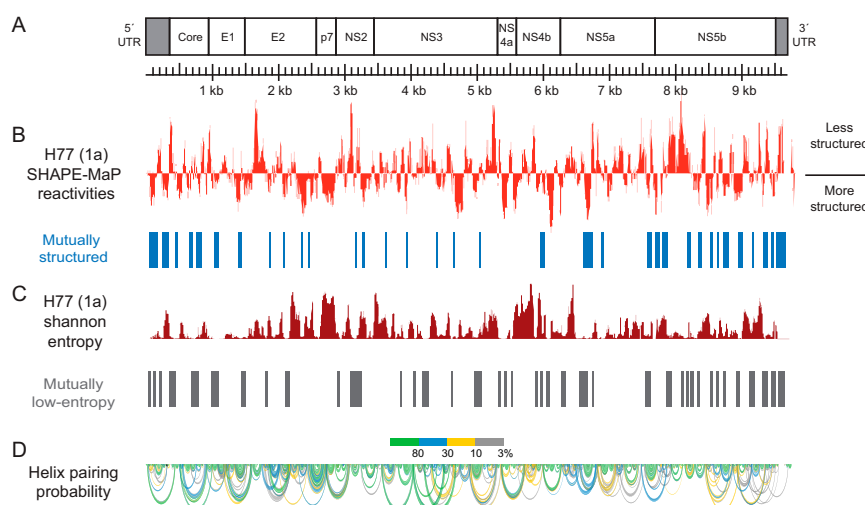

**Fig. S1.** Structural analysis of the HCV-H77 (1a) genome. (A) Diagram of the HCV-H77 genome. (B) Normalized median SHAPE reactivities (over 51-nt windows). The global median of the entire population is defined as 0.0. Valleys (low median SHAPE reactivity) represent highly structured regions, and peaks represent conformationally flexible regions. Regions identified as mutually structured across all three genomes are indicated with blue bars. (C) Median Shannon entropies (over 51-nt windows). Regions with low Shannon entropies are those likely to adopt single, well-defined conformations. Regions with low Shannon entropies across all three genomes are emphasized with gray bars. (D) Structural model for the entire H77 RNA genome. Helices are shown as arcs, colored according to base-pairing probabilities as calculated from the SHAPE-directed partition function (6). Helices shown with green arcs have well-defined structures. Regions with overlapping blue, yellow, and gray arcs likely sample multiple conformations.









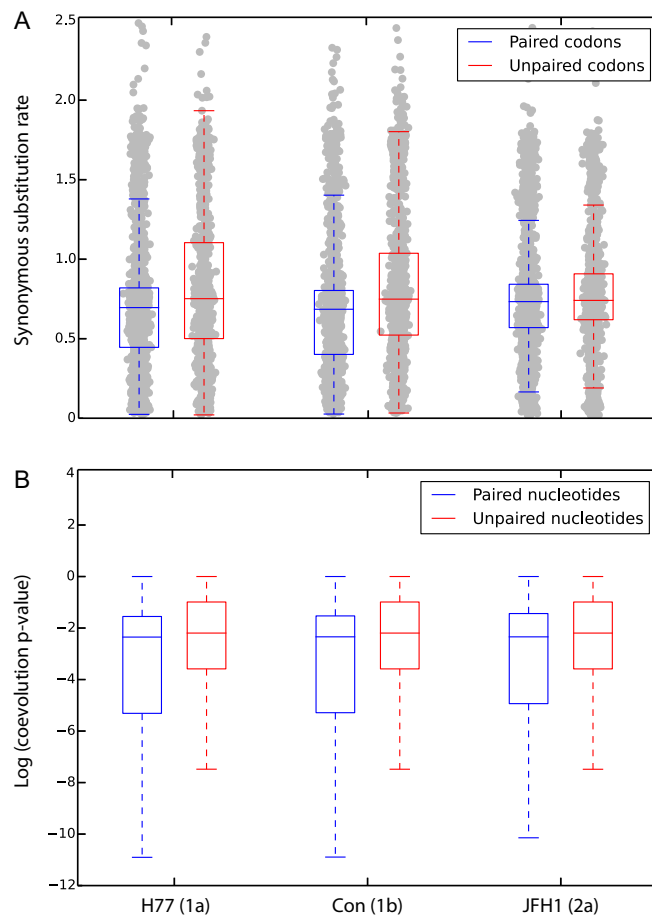

**Fig. 56.** Genome-wide distributions of synonymous substitution rates and degrees of coevolution across the HCV coding region identified in the SHAPE-directed minimum free-energy analyses. (A) Synonymous codon substitution rates. Base-paired codons were defined as those with two or three base-paired nucleotides, and unpaired codons were defined as containing 0 or 1 base-paired nucleotides. Horizontal lines represent median synonymous substitution rates; the bounds of the box and whiskers reflect the 50% and 95% ranges of these values, respectively. For H77, Con, and JFH1, the median synonymous substitution rates of the paired codons (respectively 0.696, 0.685, and 0.733) were significantly lower (respective Mann–Whitney  $U$  test  $P$  values are  $1.046 \times 10^{-8}$ ,  $4.270 \times 10^{-14}$ , and  $3.552 \times 10^{-2}$ ) than those of the unpaired codons (respectively 0.752, 0.749, and 0.741). (B) Degrees of coevolution at base-paired versus unpaired nucleotides. Median log(likelihood ratio test  $P$  values) for each site-pair across paired nucleotides in H77, Con, and JFH1 (respectively 0.095, 0.096, and 0.096) are significantly lower (respective Mann–Whitney  $U$  test,  $P$  values are  $3.45 \times 10^{-43}$ ,  $7.43 \times 10^{-35}$ , and  $2.02 \times 10^{-30}$ ) than those of the unpaired nucleotides (respectively 0.111, 0.111, and 0.111). Critically, despite their high degrees of statistical significance, the ranges of the synonymous substitution rates (A) and distributions of these  $P$  values (B) broadly overlap between the base-paired and unpaired sites, emphasizing the need for additional structure-based criteria to accurately identify evolutionarily conserved structural motifs.







**Table S1. Conserved regions**

| Identified region | Elements within region | H77 position | Con1b position | JFH1 position | Previous biochemical data | Previous structural model | Model agreement: Previous model vs. SHAPE | Publications                                                                       |
|-------------------|------------------------|--------------|----------------|---------------|---------------------------|---------------------------|-------------------------------------------|------------------------------------------------------------------------------------|
| 1                 | IRES Domains I and II  | 1–98         | 1–98           | 1–97          | Yes                       | Yes                       | Yes                                       | Tuskiyama-Kohara et al. (1) and Brown et al. (2)                                   |
| 107               | IRES Domain III        | 108–270      | 108–270        | 107–269       | Yes                       | Yes                       | Yes                                       | Tuskiyama-Kohara et al. (1) and Brown et al. (2)                                   |
| 316               | IRES Domains IV and V  | 314–469      | 314–469        | 313–468       | Yes                       | Yes                       | Yes                                       | Tuplin et al. (3)                                                                  |
| 603               | Structure 700          | 601–838      | 601–838        | 600–837       | Partial                   | Yes                       | Partially                                 | Tuplin et al. (3)                                                                  |
| 1130              |                        | 1130–1206    | 1130–1206      | 1129–1205     | No                        | No                        |                                           |                                                                                    |
| 1854              |                        | 1854–1951    | 1854–1951      | 1858–1955     | No                        | No                        |                                           |                                                                                    |
| 3703              |                        | 3703–3785    | 3703–3785      | 3712–3794     | No                        | No                        |                                           |                                                                                    |
| 4678              |                        | 4678–4757    | 4678–4757      | 4687–4766     | No                        | No                        |                                           |                                                                                    |
| 4786              |                        | 4786–4861    | 4786–4861      | 4795–4870     | No                        | No                        |                                           |                                                                                    |
| 6848              |                        | 6846–6921    | 6846–6921      | 6855–6930     | No                        | No                        |                                           |                                                                                    |
| 7493              | Structure 7500         | 7493–7641    | 7493–7638      | 7502–7704     | No                        | No                        |                                           |                                                                                    |
| 7802              | Structure 7900         | 7802–7954    | 7799–7951      | 7865–8017     | No                        | Yes                       | Partially                                 | Tuplin et al. (3),<br>Chu et al. (4),<br>and You et al. (5)                        |
| 8567              | Structure 8600         | 8567–8719    | 8564–8716      | 8630–8782     | No                        | Yes                       | Partially                                 | Tuplin et al. (3),<br>Chu et al. (4),<br>and You et al. (5)                        |
| 8967              | SL 9098, 9198, 9283    | 8967–9299    | 8964–9296      | 9030–9362     | Yes                       | Yes                       | Yes                                       | Tuplin et al. (3),<br>Chu et al. (4),<br>You et al. (5), and<br>Diviney et al. (6) |
| 9353              | SL 9332, 9389          | 9353–9499    | 9350–9605      | 9416–9676     | Yes                       | Yes                       | Yes                                       | Tuplin et al. (3),<br>Chu et al. (4),<br>You et al. (5), and<br>Diviney et al. (6) |

1. Tuskiyama-Kohara K, Iizuka N, Kohara M, Nomoto A (1992) Internal ribosome entry site within hepatitis C virus RNA. *J Virol* 66(3):1476–1483.

2. Brown EA, Zhang H, Ping LH, Lemon SM (1992) Secondary structure of the 5' nontranslated regions of hepatitis C virus and pestivirus genomic RNAs. *Nucleic Acids Res* 20(19):5041–5045.

3. Tuplin A, Evans DJ, Simmonds P (2004) Detailed mapping of RNA secondary structures in core and NS5B-encoding region sequences of hepatitis C virus by RNase cleavage and novel bioinformatic prediction methods. *J Gen Virol* 85(Pt 10):3037–3047.

4. Chu D, et al. (2013) Systematic analysis of enhancer and critical cis-acting RNA elements in the protein-encoding region of the hepatitis C virus genome. *J Virol* 87(10):5678–5696.

5. You S, Stump DD, Branch AD, Rice CM (2004) A cis-acting replication element in the sequence encoding the NS5B RNA-dependent RNA polymerase is required for hepatitis C virus RNA replication. *J Virol* 78(3):1352–1366.

6. Diviney S, et al. (2008) A hepatitis C virus cis-acting replication element forms a long-range RNA-RNA interaction with upstream RNA sequences in NS5B. *J Virol* 82(18):9008–9022.



**Table S2. Cont.**

| Mutant element | Genome region | DNA start | DNA end | DNA sequence                                                                                                                                                                                                                                                                                                                                                                                                                                                                                                                                                                                                                                                                                                                                                                                                                                                                                                                                                                                                                                                                                                                                                                                                                                                                                                                                                                                                                     |
|----------------|---------------|-----------|---------|----------------------------------------------------------------------------------------------------------------------------------------------------------------------------------------------------------------------------------------------------------------------------------------------------------------------------------------------------------------------------------------------------------------------------------------------------------------------------------------------------------------------------------------------------------------------------------------------------------------------------------------------------------------------------------------------------------------------------------------------------------------------------------------------------------------------------------------------------------------------------------------------------------------------------------------------------------------------------------------------------------------------------------------------------------------------------------------------------------------------------------------------------------------------------------------------------------------------------------------------------------------------------------------------------------------------------------------------------------------------------------------------------------------------------------|
| H8560          | NS5B          | 7906      | 9167    | GGCTATGGGGCAAAGACGTCCGTTGCCATGCCAGAAAGGCCGTAGCCC-<br>ACATCAACTCCGTGTGGAAAGACCTTCTGGAAGACAGTGTAAACACCAA-<br>TAGACTACTACATCATGGCCAAGAACGAGGTTTTCTGCGTTCCAGCCTGA-<br>GAAGGGGGTTCGTAAGCCAGCTCGTCTCATCGTGTCCCGACCTGGG-<br>CGTGCGCGTGTGCGAGAAGATGGCCCTGTACGACGTGGTTAGCAAGC-<br>TCCCCTGGCCGTGATGGGAAGCTCCTACGGATTCCAATACTACCAG-<br>GACAGCGGGTTGAATTCTCTGTGCAAGCGTGGAAAGTCCAAGAAGACC-<br>CCGATGGGGTTCTCGTATGATACCCGCTGTTTTGACTCCACAGTCACTG-<br>AGAGCGACATCCGTACGGAGGAGGCAATTTACCAATGTTGTGACCTG-<br>GACCCCAAGCCCGGTGGCCATCAAGTCCCTCACTGAGAGGCTTTAT-<br>GTTGGGGCCCTCTTACCAATTCAAGGGGGGAAAAGTGGCGCTACCG-<br>CAGGTGCCGCGAGCGGCGTACTGACAACTAGCTGTGGTAAACCCC-<br>TCACTTGCTACATCAAGGCCCGGGCAGCCTGTGAGCCGCGAGGGCTCC-<br>AGGACTGCACCATGCTCGTGTGTGGCGACGACTTAGTGTTATATGTG-<br>AATCAGCAGGAGTGCAAGAAGACGCAGCGTCATTGAGAGCATTAC-<br>AGAAGCAATGACACGCTACTCCGCCCCACCAGGAGATCCACCACAAC-<br>CTGAATATGATTTGGAGCTTATAACATCATGCTCCTCCAACGTGTCAGT-<br>CGCCACGACGGCGCTGGAAAGAGGGTCTACTACCTTACCCGTGACCC-<br>TACAACCCCTCGCGAGAGCCGCGTGGGAGACAGCAAGACACACTC-<br>CAGTCAATTCCTGGCTAGGCAACATAATCATGTTTCCCCCACACTGT-<br>GGGCGAGGATGATACTGATGACCCATTTCTTTAGCGTCCTCATAGCCA-<br>GGGATCAGCTTGAACAGGCTCTTAACTGTGAGATCTACGGAGCCTGCT-<br>ACTCCATAGAACCACTGGATCTACCTCCAATCATTCAAAGACTCCATGG-<br>CCTCAGCGCATTTTCACTCCACAGTTACTCTCAGGTGAAATCAATAGG-<br>GTGGCCGATGCCTCAGAAAAGTTGGGGTCCCGCCCTTGCGAGCTTGG-<br>AGACACCGGGCCCGAGCGTCCGCGCTAGGCTTCTGTCCAGAGGAGG-<br>CAGGGCTGCCATATGTGG |

## Other Supporting Information Files

[Dataset S1 \(XLSX\)](#)

[Dataset S2 \(CT\)](#)

[Dataset S3 \(FASTA\)](#)
